# Supplementary material for: Silibinin Suppresses Tumor Cell-Intrinsic Resistance to Nintedanib and Enhances Its Clinical Activity in Lung Cancer
Source: MDPI journal article supplement (doi:10.3390/cancers13164168), 2021-08-19

**Silibinin suppresses tumor cell-intrinsic resistance to  
nintedanib and enhances its clinical activity in lung cancer**

Uncropped images

**Figure 3 NTD-responsive 24h**

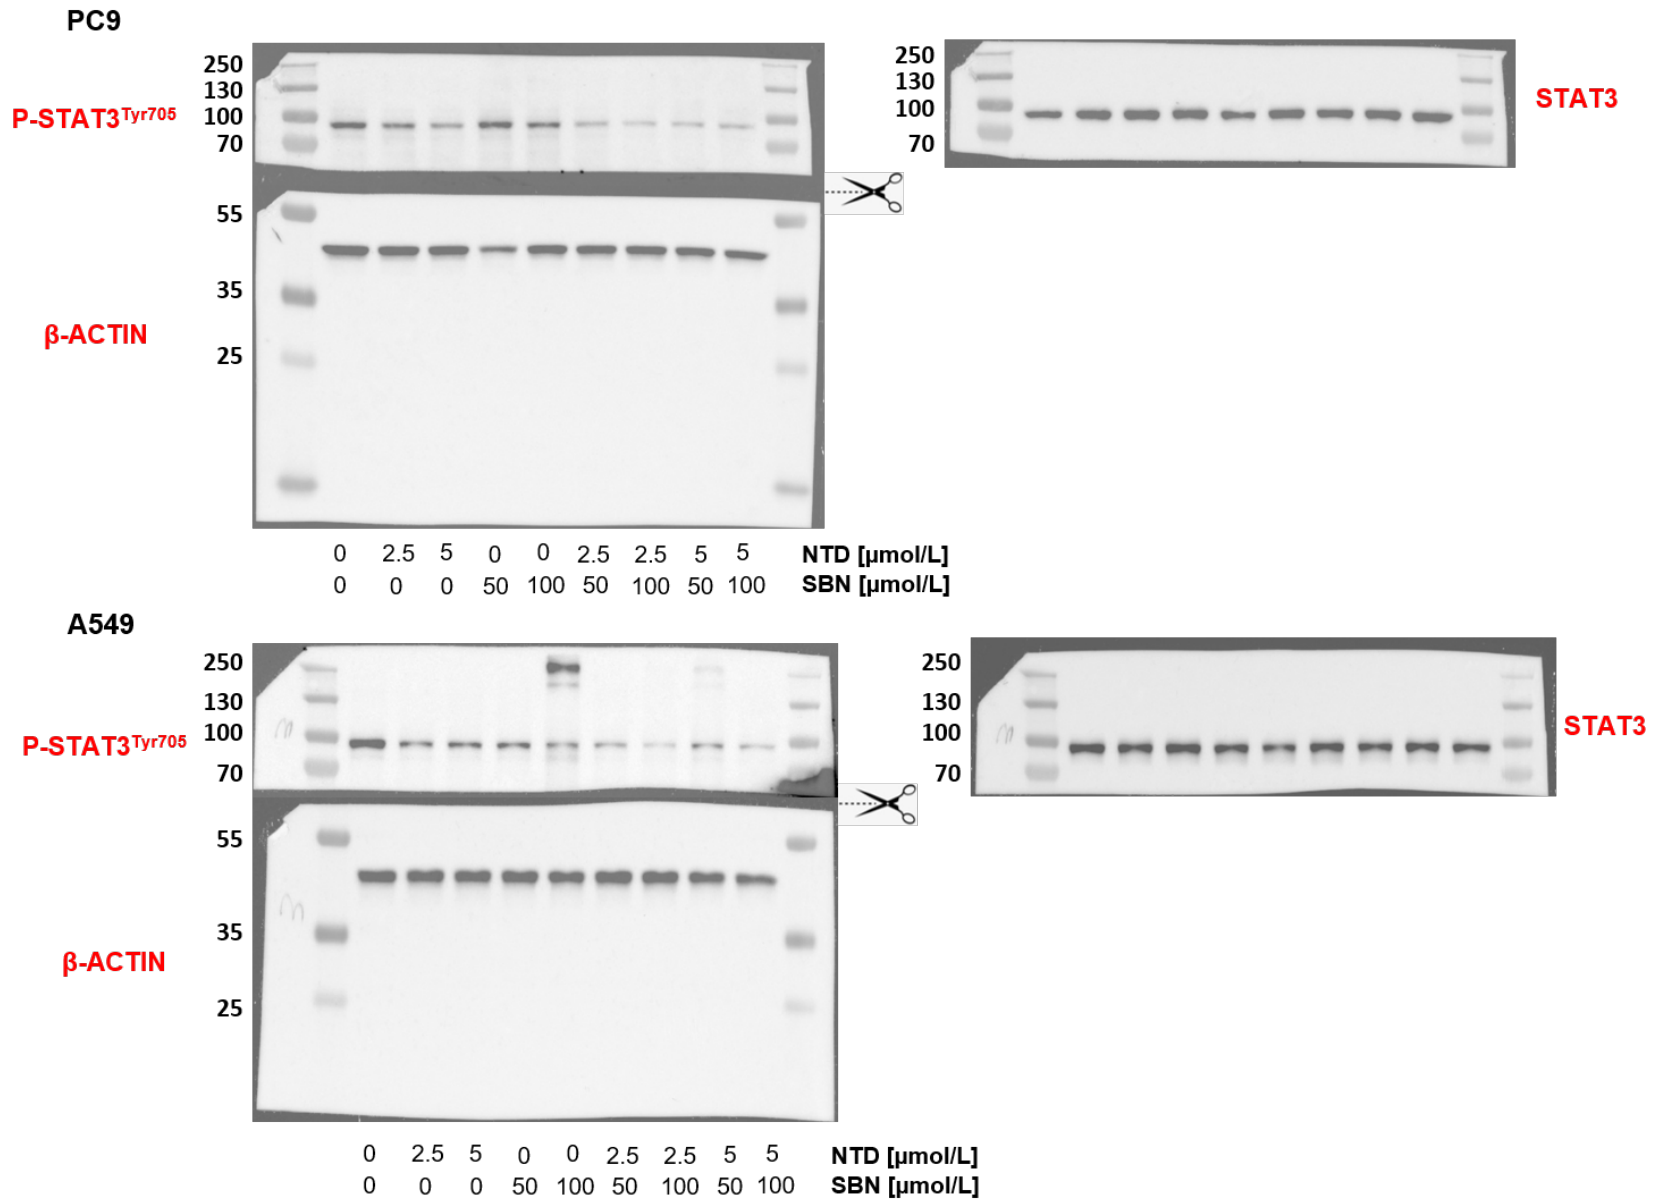

**Figure 3 NTD-resistant 24h**

**H460**

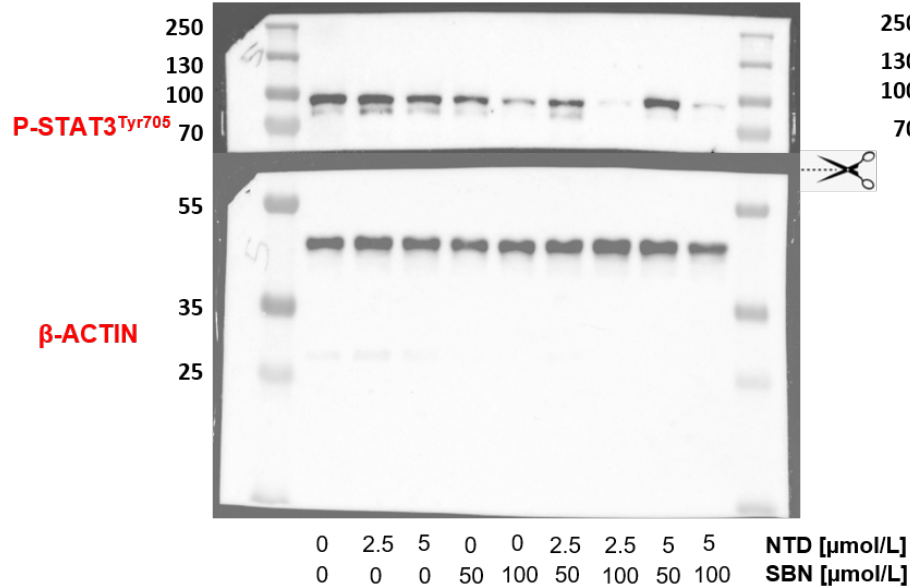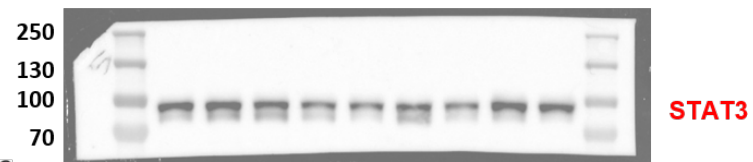

**STAT3**

**H1975**

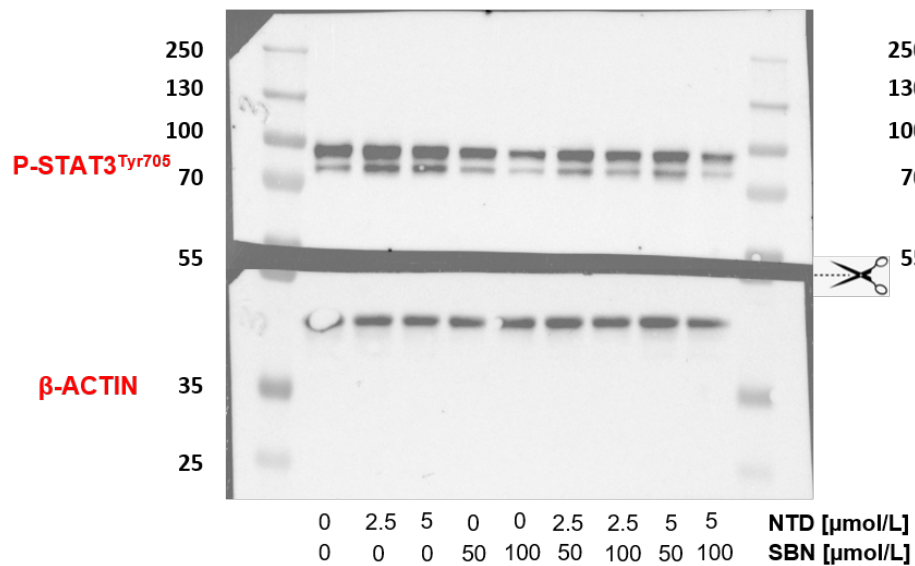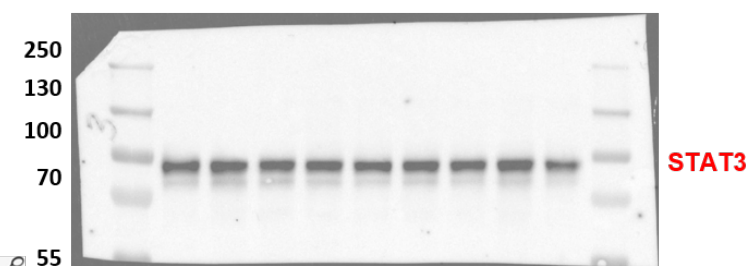

**STAT3**

**Figure 3 NTD-resistant 48h**

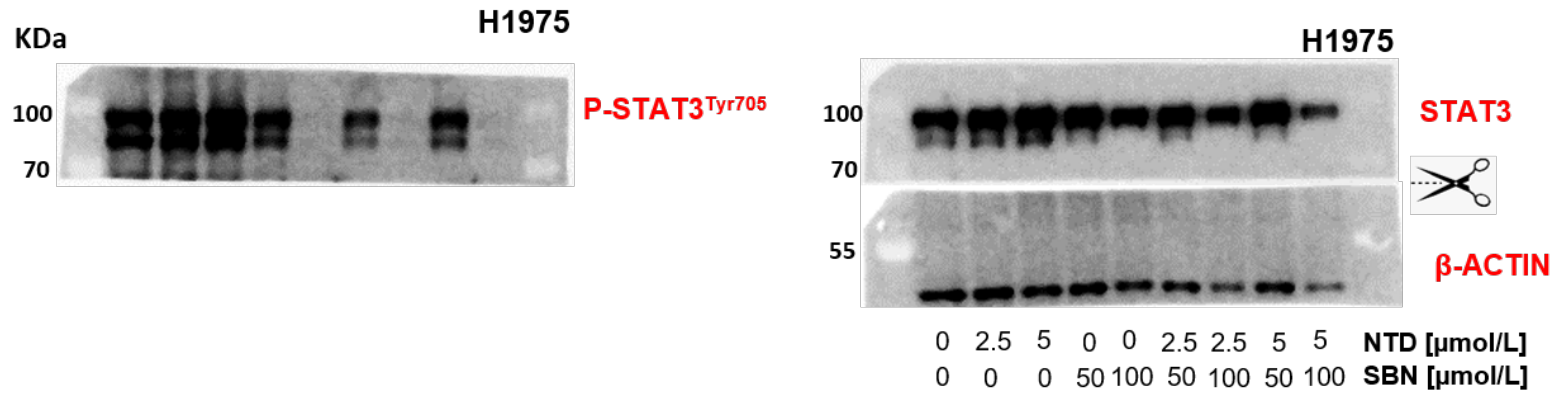

**Figure S3 A** Broken boxes marks the final cropped images

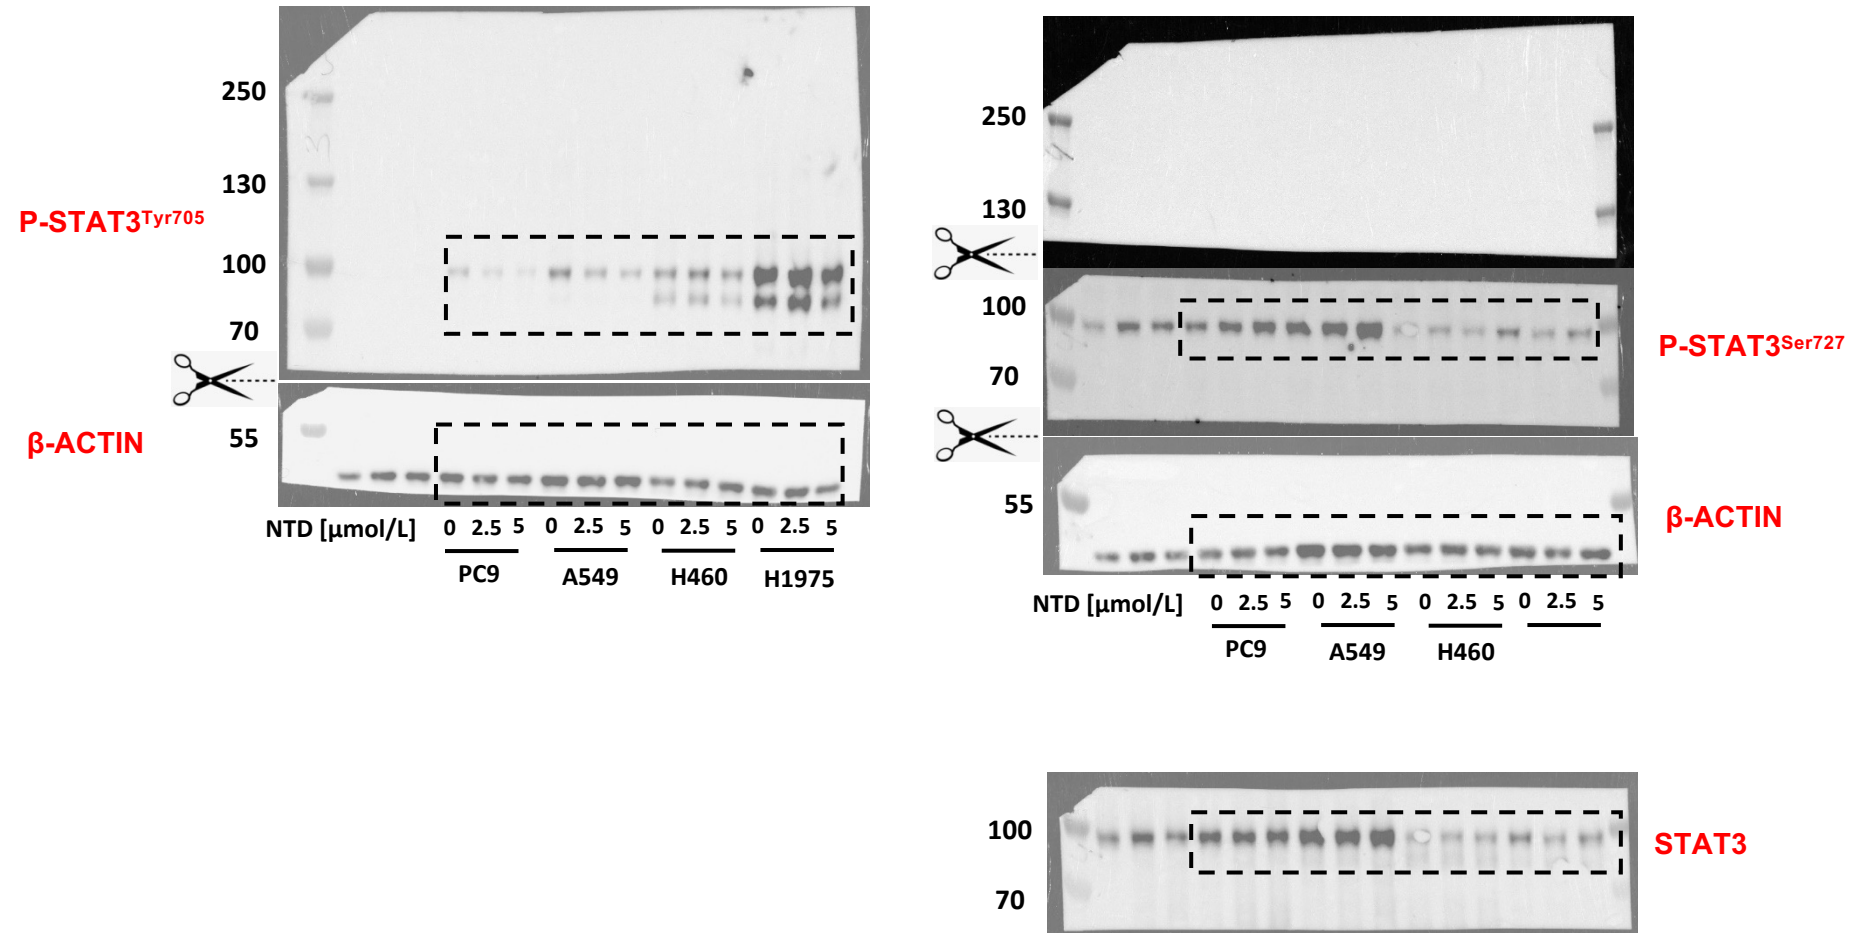

# Figure S3 B

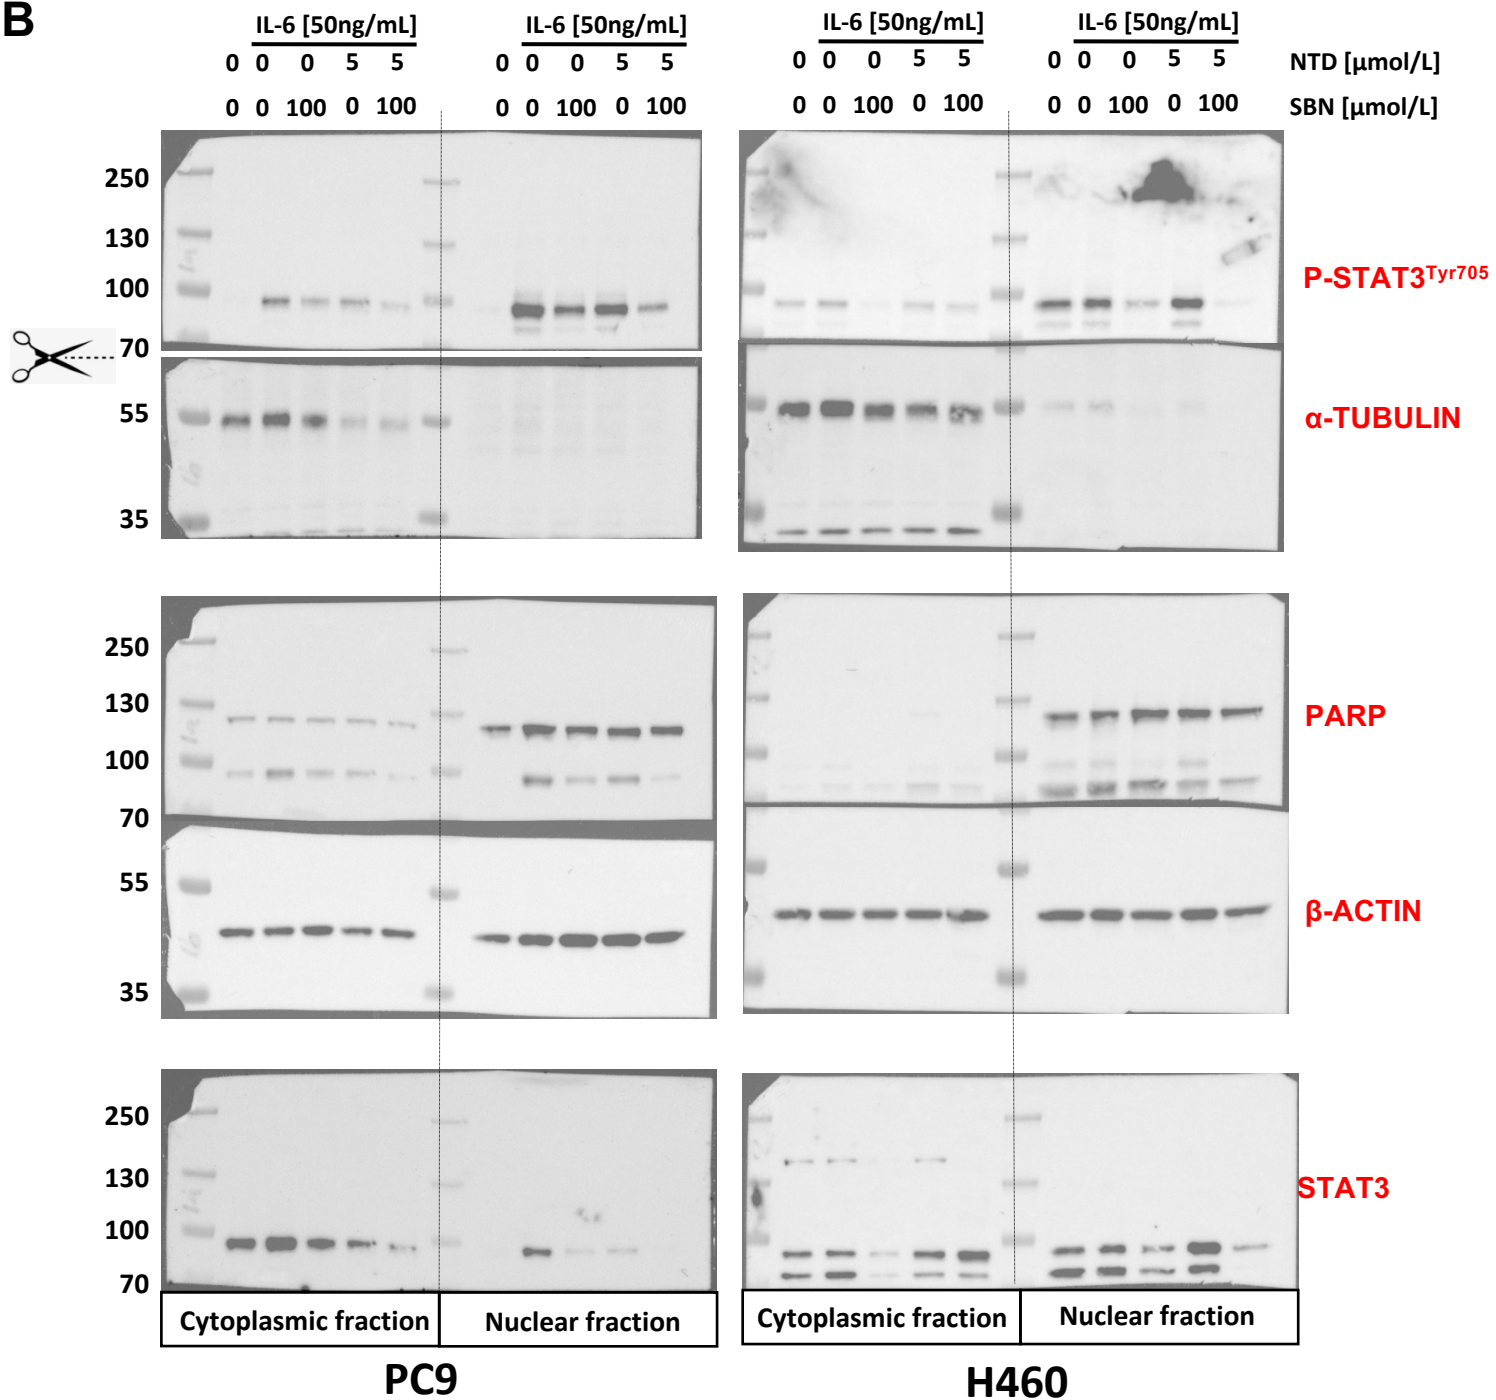

Supplement: s1 [file s1]
