# Supplementary material for: Silibinin Suppresses Tumor Cell-Intrinsic Resistance to Nintedanib and Enhances Its Clinical Activity in Lung Cancer
Source: MDPI journal article supplement (doi:10.3390/cancers13164168), 2021-08-19
Supplement: s1 [file s1]

# Supplementary Materials: Silibinin Suppresses Tumor Cell-Intrinsic Resistance to Nintedanib and Enhances Its Clinical Activity in Lung Cancer

Joaquim Bosch-Barrera, Sara Verdura, José Carlos Ruffinelli, Enric Carcereny, Elia Sais, Elisabet Cuyàs, Ramon Palmero, Eugeni López-Bonet, Alejandro Hernández-Martínez, Gloria Oliveras, Maria Buxó, Angel Izquierdo, Teresa Morán, Ernest Nadal and Javier A. Menéndez

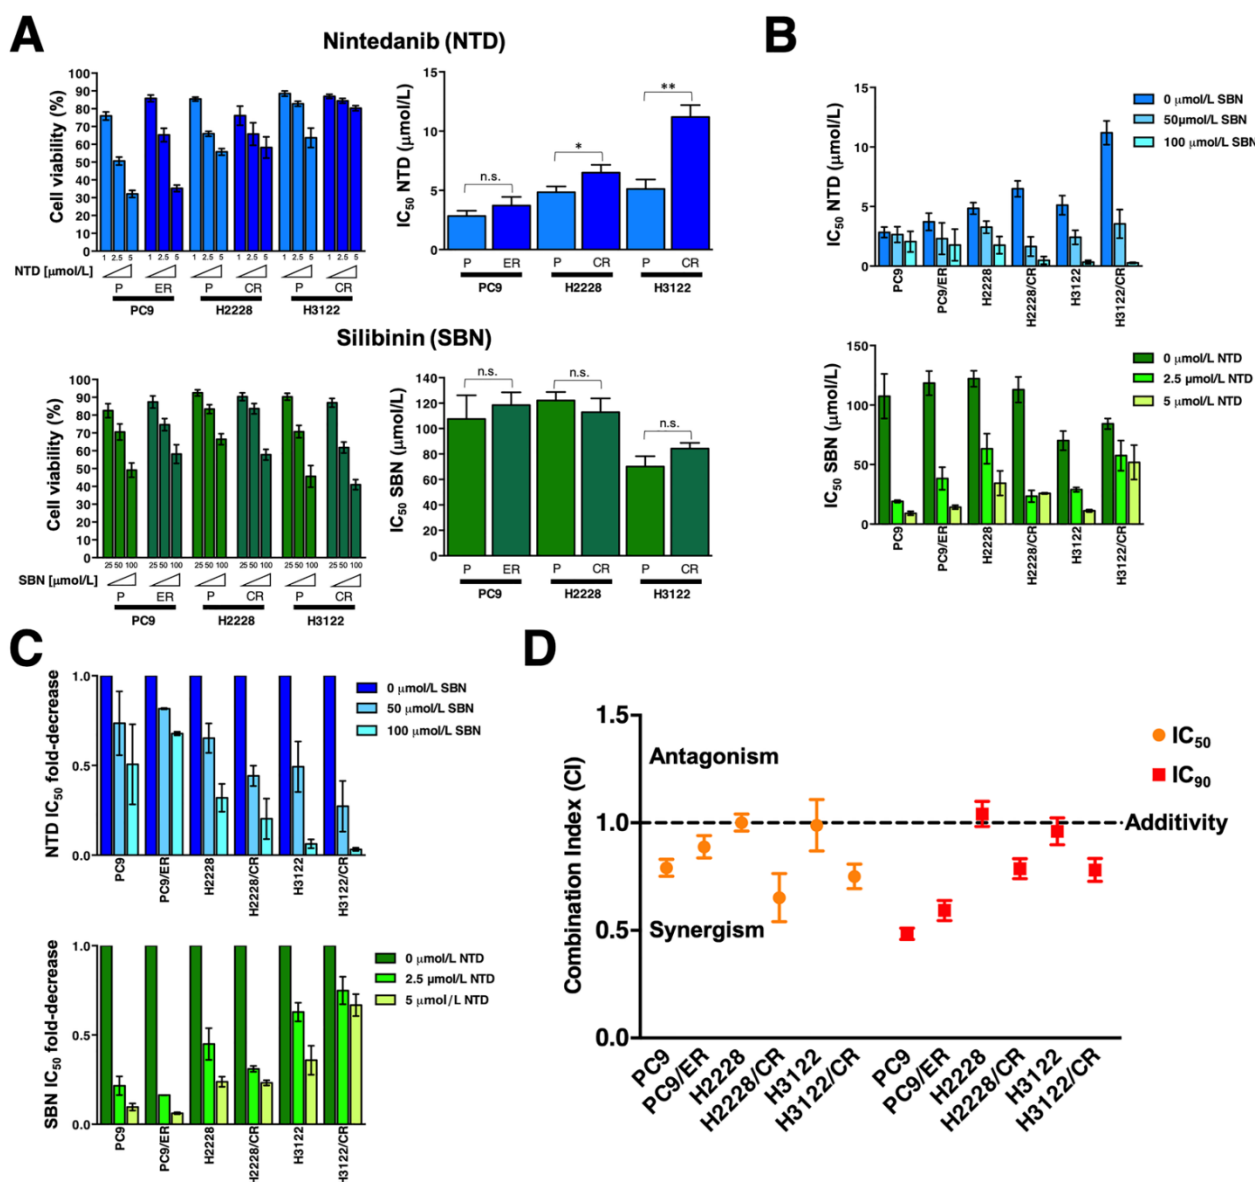

**Figure S1.** Analysis of the cytotoxic interaction between nintedanib and silibinin in NSCLC cells with acquired resistance to erlotinib and crizotinib. **A. Left panels.** The metabolic status of parental (P) PC-9, H2228, and H3122 cell lines and erlotinib- and crizotinib- (ER and CR) resistant derivatives treated with increasing concentrations of nintedanib (NTD; 1.25, 2.5, and 5 μmol/L) and Scheme 25. 50, and 100 μmol/L) was measured using MTT uptake assays, and cell viability is expressed as % uptake relative to untreated control cells (=100% cell viability). **Right panels.** Bar graphs of the IC<sub>50</sub> values for each cell line calculated from the MTT assays as described in “Materials and methods”. The results are presented as the means (columns) ± S.D. (bars) (n=3, in triplicate). **B.** Bar graphs showing the MTT-based IC<sub>50</sub> values of NTD (top) and SBN (bottom) for each cell line calculated in the absence or presence of graded concentrations of SBN and NTD, respectively. **C.** Bar graphs showing the fold-change in NTD (top) and SBN (bottom) IC<sub>50</sub> values obtained in the absence or presence of graded concentrations of SBN and NTD, respectively. **D.** Computed combination index (CI) values for the

combination of NTD and SBN at 50% and 90% effect levels. CI values less than, equal to, or greater than 1 indicates synergy, additivity, or antagonism, respectively. The horizontal line at CI=1 is the line of additivity. The results in A, B, C, and D panels are presented as the means (columns)  $\pm$  S.D. (bars) (n=3, in triplicate).

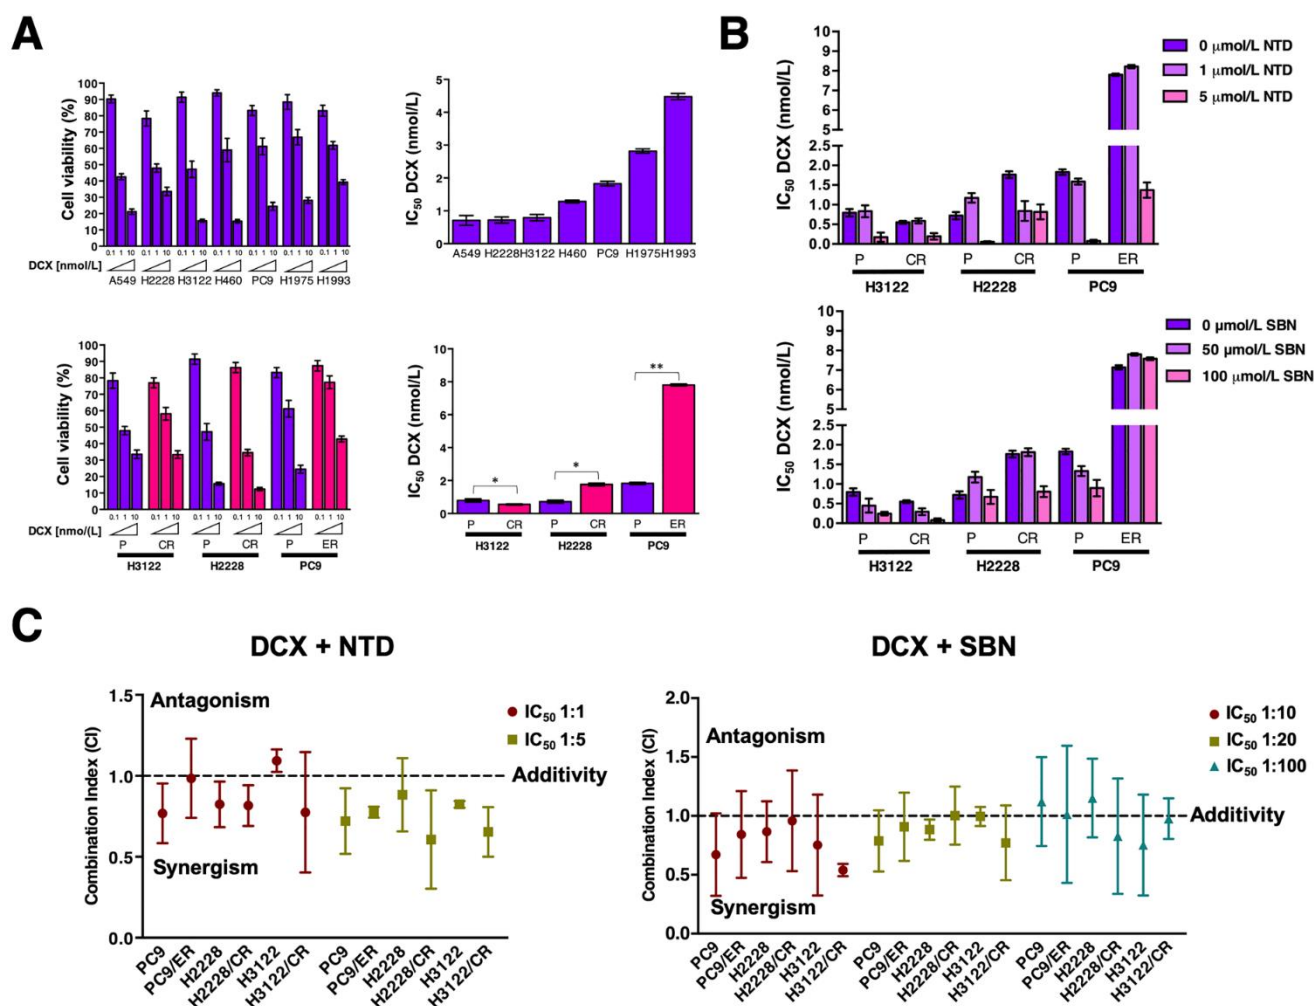

**Figure S2.** Analysis of the cytotoxic interaction between docetaxel, nintedanib, and silibinin in NSCLC cells with acquired resistance to erlotinib and crizotinib. **A. Left panels.** The metabolic status of parental (*top*) and erlotinib- and crizotinib- (ER and CR) resistant derivatives (*bottom*) treated with increasing concentrations of docetaxel (DCX; 0.1, 1.0, and 10 nmol/L) was measured using MTT uptake assays, and cell viability is expressed as % uptake relative to untreated control cells (=100% cell viability). **Right panels.** Bar graphs of the  $IC_{50}$  values for each cell line calculated from the MTT assays as described in “Materials and methods”. The results are presented as the means (columns)  $\pm$  S.D. (bars) (n=3, in triplicate). **B.** Bar graphs showing the MTT-based  $IC_{50}$  values of DCX for each pair of parental (P) and erlotinib- and crizotinib-resistant derivatives calculated in the absence or presence of graded concentrations of NTD (*top*) and SBN (*bottom*). **C.** Computed combination index (CI) values for the combination of DCX plus NTD (*left*) and DCX plus SBN (*right*) at 50% effect levels using different fixed ratio combinations of the drugs. CI values less than, equal to, or greater than 1 indicates synergy, additivity, or antagonism, respectively. The horizontal line at CI=1 is the line of additivity. The results in A, B, and C panels are presented as the means (columns)  $\pm$  S.D. (bars) (n=3, in triplicate).

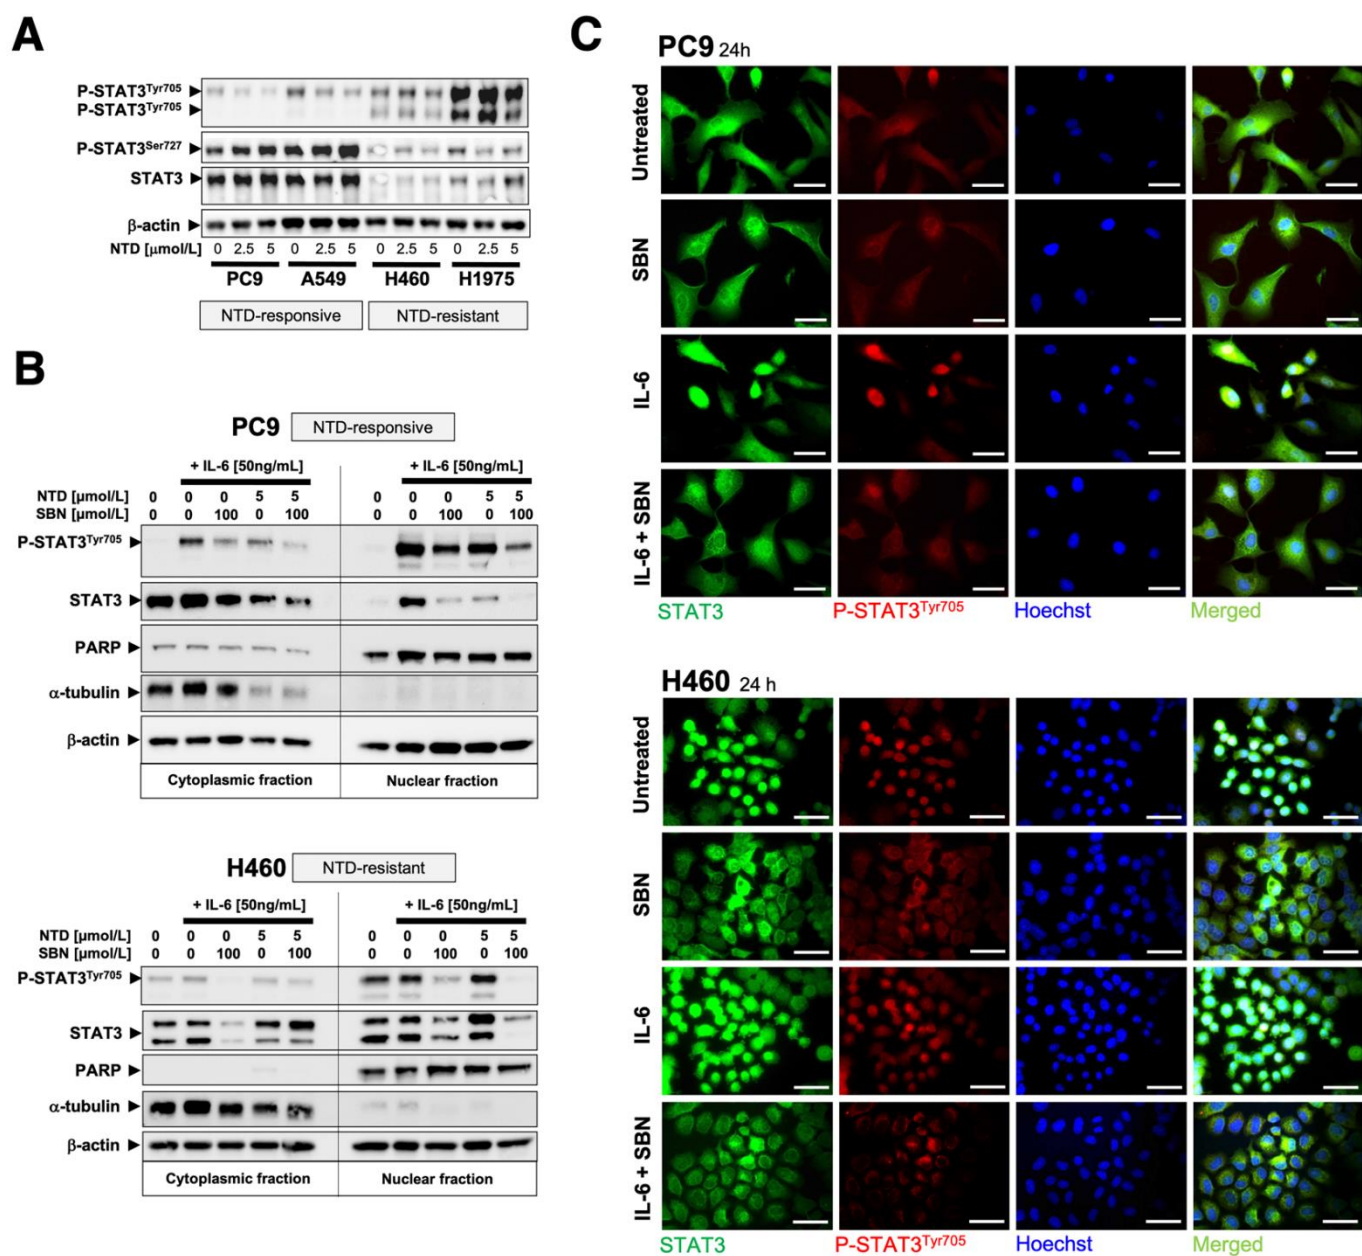

**Figure S3.** Effects of silibinin on the intracellular distribution of STAT3 and phospho-STAT3<sup>Tyr705</sup>. **A.** Nintedanib (NTD)-responsive PC-9 and A549 cells, and NTD-resistant H460 and H1975 cells were serum-starved overnight and then left untreated or treated with graded concentrations of NTD for 24 h. Levels of phospho-STAT3<sup>Tyr705</sup>, phospho-STAT3<sup>Ser727</sup>, and STAT3 were detected by immunoblotting using specific antibodies. Figures show representative immunoblots of multiple ( $n \geq 3$ ) independent experiments. **B.** Levels of phospho-STAT3<sup>Tyr705</sup> and STAT3 were detected by immunoblotting in cytoplasmic and nuclear fractions of PC-9 (*top*), and H460 cells (*bottom*) cultured in the absence or presence of NTD, SBN, and/or 50 ng/mL IL-6. Figures show representative immunoblots of multiple ( $n \geq 3$ ) independent experiments. **C.** PC9 cells (*top*) and H460 cells (*bottom*) stimulated with IL-6 (50 ng/mL) in the absence or presence of silibinin (100 μmol/L). After 24 h, cells were fixed with ice-cold methanol and stained for total STAT3 or phospho-STAT3 Tyr705, followed by Alexa Fluor®-conjugated secondary antibody and Hoechst counterstaining. Figure shows representative immunofluorescence microphotographs of at least 3 independent experiments performed in triplicate. The scale bar indicates 50 μm.

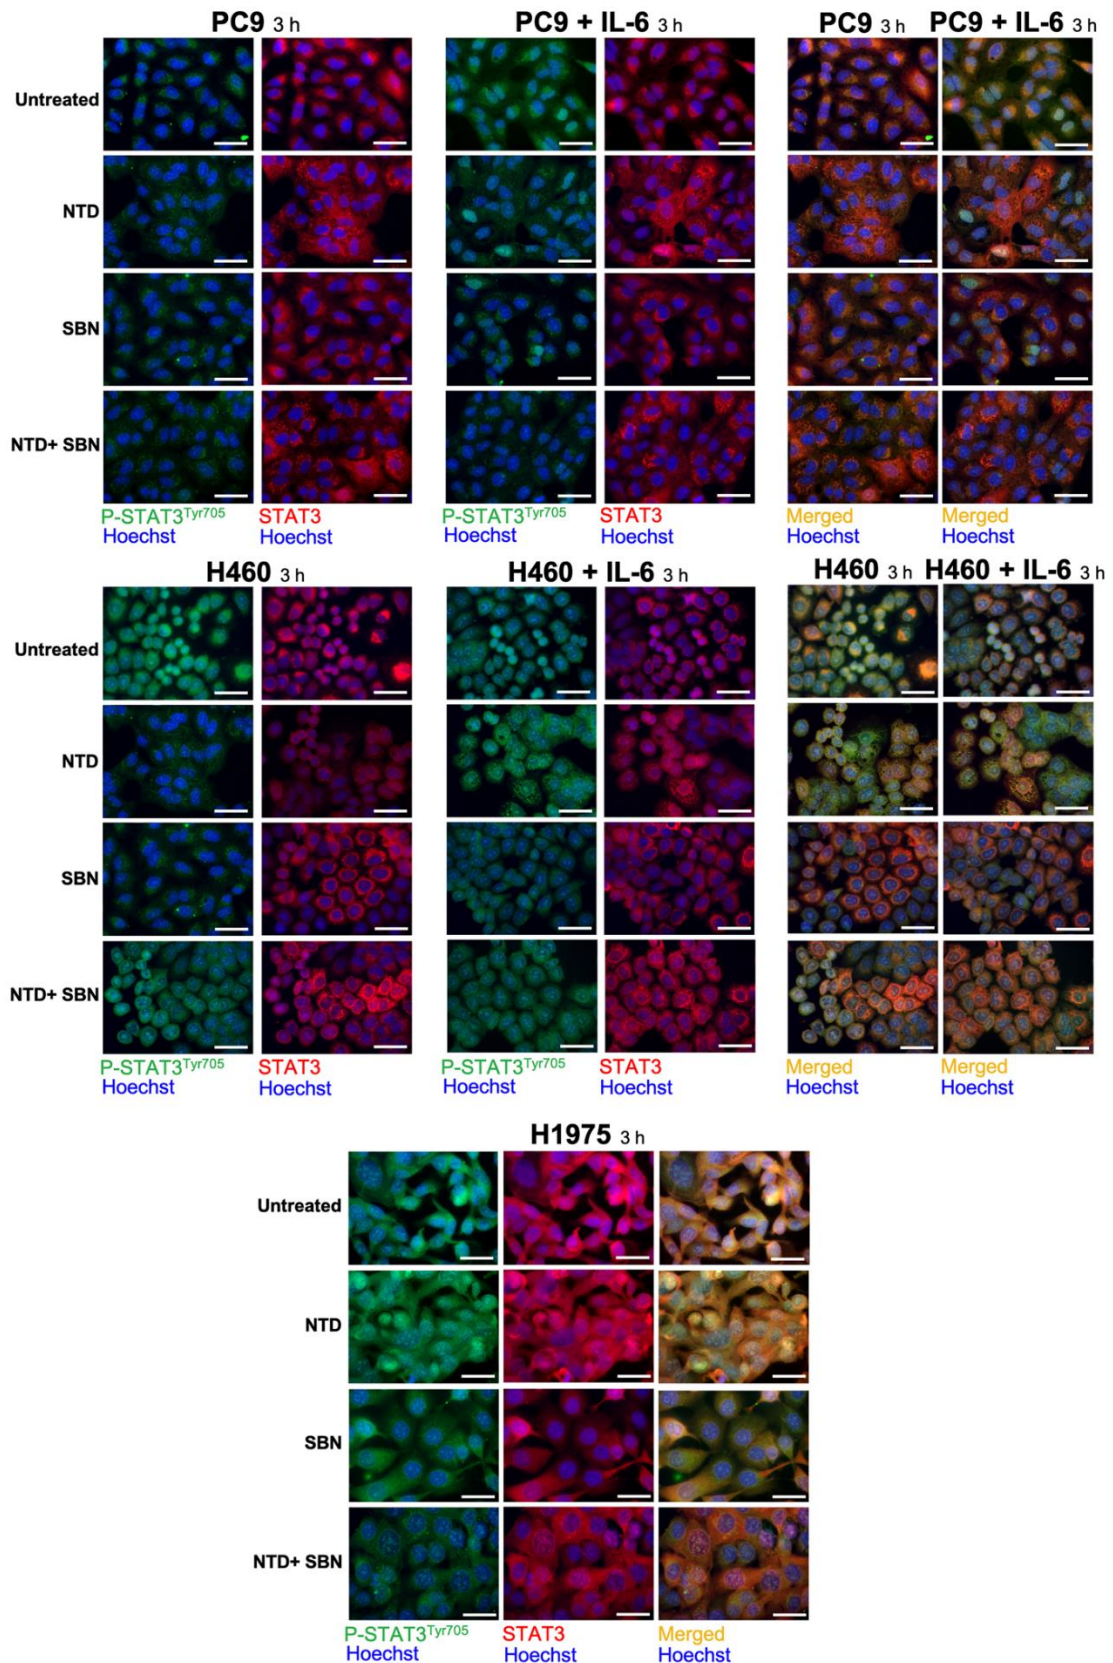

**Figure S4.** Effects of nintedanib and silibinin on the intracellular distribution of STAT3 and phospho-STAT3<sup>Tyr705</sup>. PC9, H460, and H1975 cells (stimulated or not with IL-6, 50 ng/mL) were cultured in the absence or presence of nintedanib (NTD, 10  $\mu$ mol/L) and/or silibinin (SBN, 100  $\mu$ mol/L). After 3 h, cells were fixed with ice-cold methanol and stained for total STAT3 or phospho-STAT3 Tyr705, followed by Alexa Fluor<sup>®</sup>-conjugated secondary antibody and Hoechst counter-staining. Figure shows representative immunofluorescence microphotographs of at least 3 independent experiments performed in triplicate. The scale bar indicates 50  $\mu$ m.

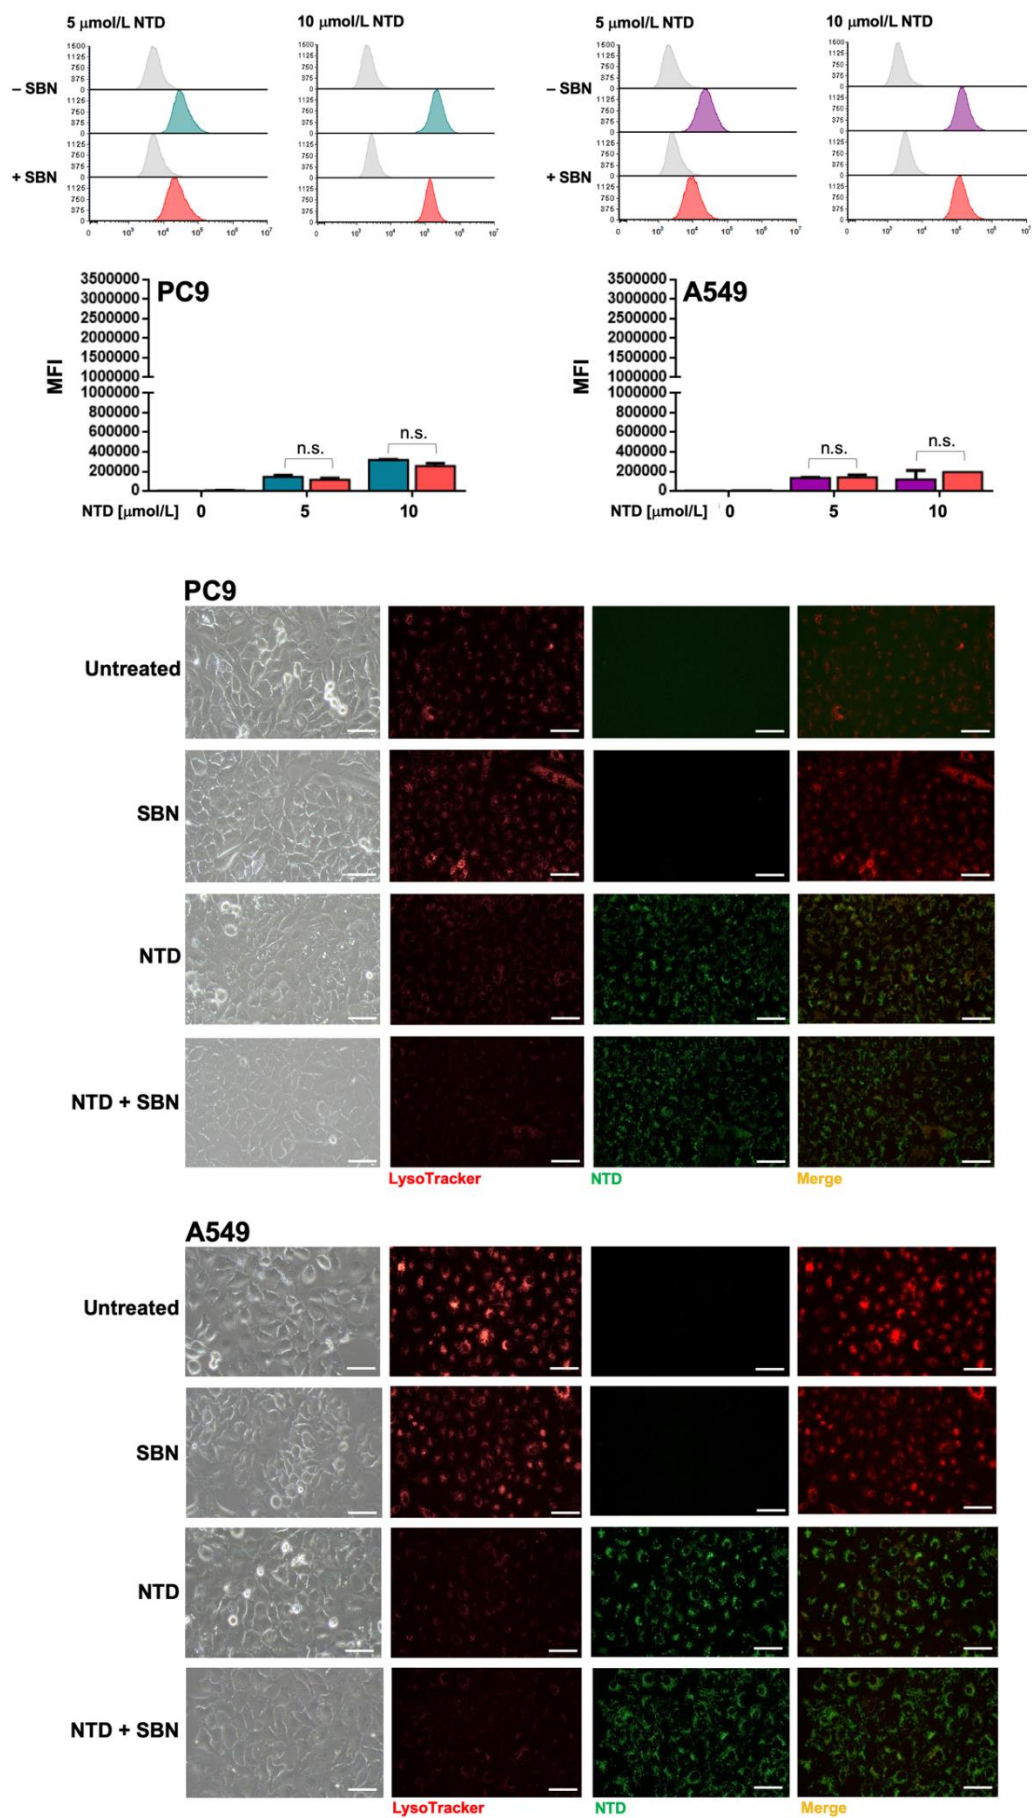

**Figure S5.** Effects of silibinin on the lysosomal sequestration of nintedanib in nintedanib-sensitive NSCLC tumor cells. The impact of 100  $\mu\text{mol/L}$  silibinin (SBN; 1 h pre-treatment) on the intracellular accumulation of 5 and 10  $\mu\text{mol/L}$

nintedanib (NTD) in PC9 and A549 cells was analyzed by flow cytometry (*top panels*) and live cell fluorescence microscopy (*bottom panels*) after 3 h drug exposure. Each experimental value represents the mean NTD-associated fluorescence (*columns*)  $\pm$  S.D. (*bars*) of 3 independent experiments. The scale bar indicates 50  $\mu\text{m}$ . (MFI: Mean Fluorescence Intensity).

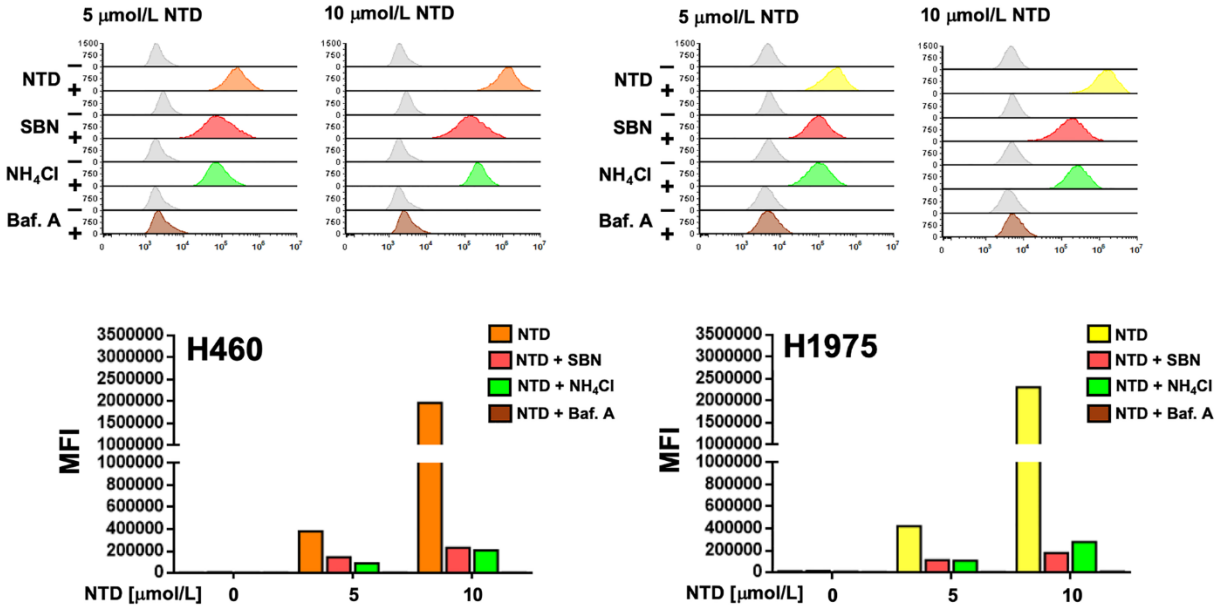

**Figure S6.** Comparative analysis of the effects of silibinin and alkalinizing agents on the lysosomal sequestration of nintedanib in nintedanib-resistant NSCLC tumor cells. The impact of 100  $\mu\text{mol/L}$  silibinin (SBN; 1 h pre-treatment), 10 mmol/L NH<sub>4</sub>Cl, and 50 nmol/L bafilomycin A (Baf. A) on the intracellular accumulation of 5 and 10  $\mu\text{mol/L}$  nintedanib (NTD) in H460 and H1975 cells was analyzed by flow cytometry (*top panels*) and live cell fluorescence microscopy (*bottom panels*) after 3 h drug exposure. Each experimental value represents the mean NTD-associated fluorescence (*columns*)  $\pm$  S.D. (*bars*) of one representative experiment. (MFI: Mean Fluorescence Intensity).

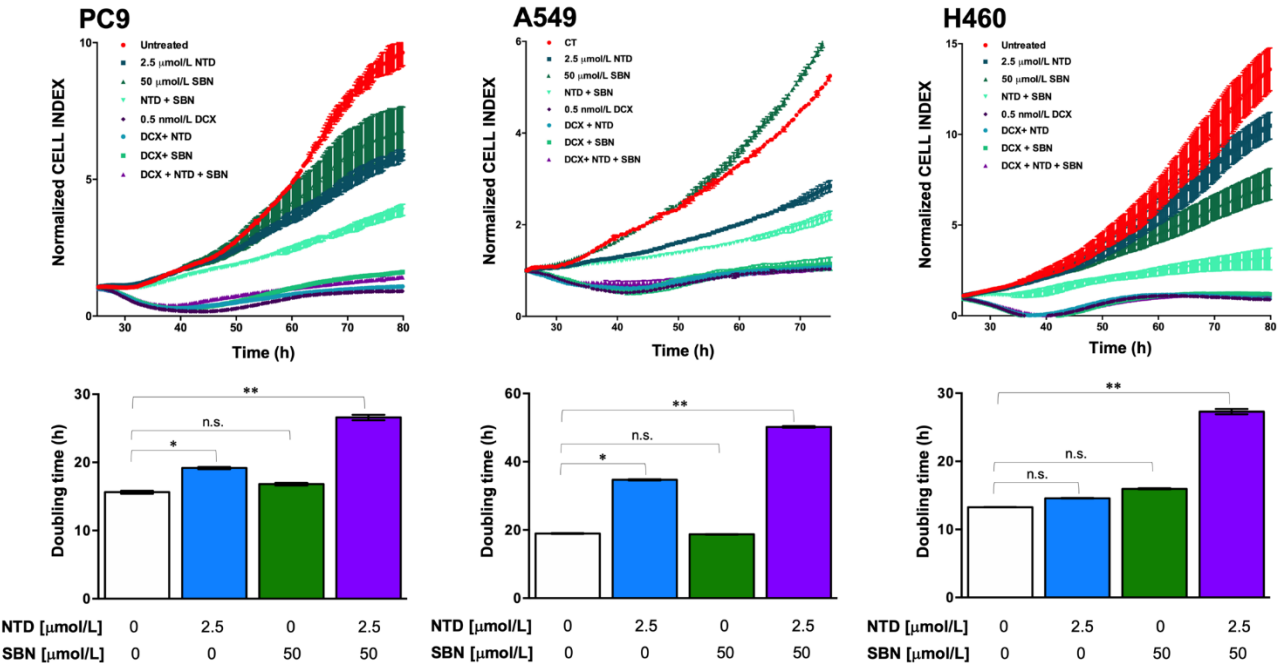

**Figure S7.** Real-time monitoring of cell proliferation in response to nintedanib, silibinin, and/or docetaxel. The rate of proliferation was monitored in real-time using the xCELLigence system. Figure shows the rates of proliferation (*top panels*) and cell doubling times (*bottom panels*) in the presence of nintedanib, silibinin, and/or docetaxel as determined by analyzing the growth curves shapes of PC-9, A549, and H460 cells between the 24 and 80 h hour interval. Doubling times results measured at 60 h are shown as mean (*columns*)  $\pm$  SD (*error bars*) from at least two experiments in which triplicate wells were analyzed. Comparisons of means were performed by ANOVA. *P* values  $< 0.01$  and  $< 0.001$  were considered to be statistically significant (denoted as \* and \*\*, respectively; n.s. not significant).

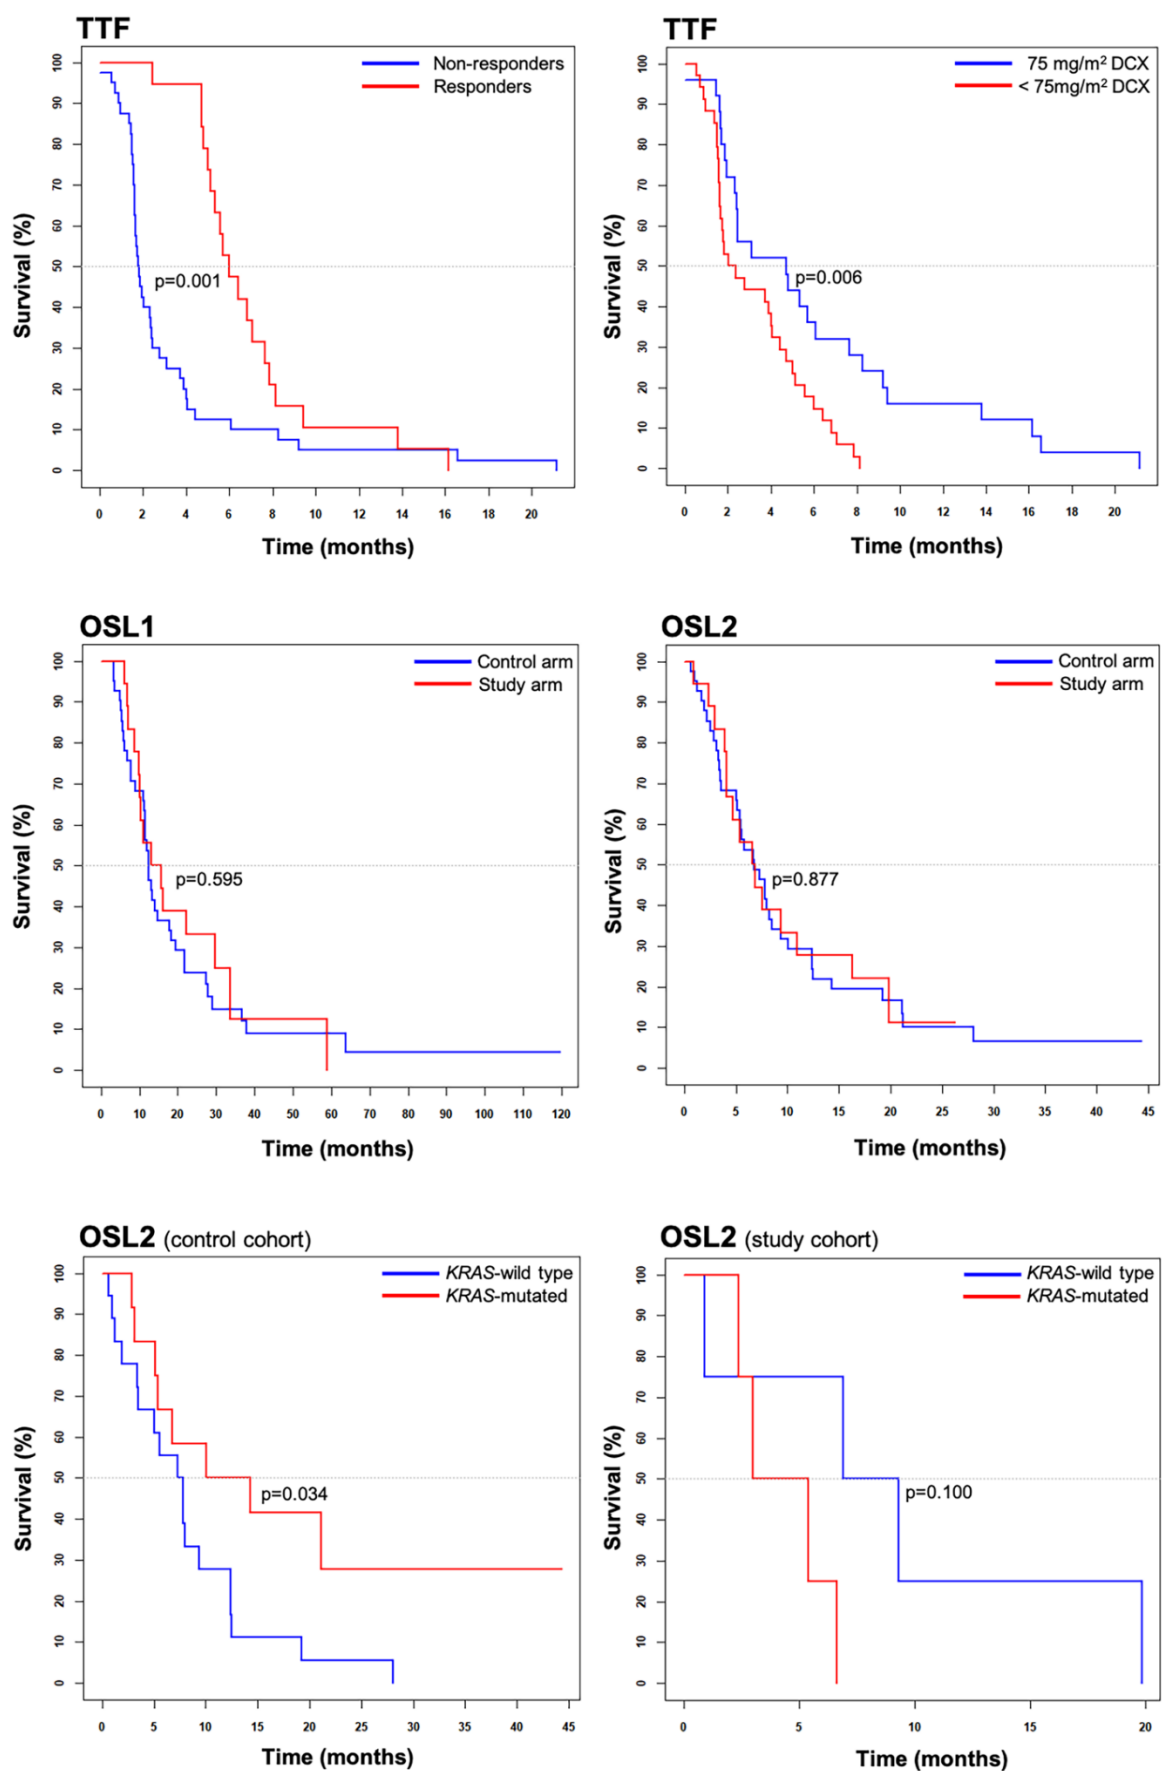

**Figure S8.** Impact of the silibinin-containing nutraceutical Legasil® on the clinical efficacy of Table 1. and OSL2 curves of patients stratified by non-responders/responders, 75 mg/m<sup>2</sup>/ $<75$  mg/m<sup>2</sup> DCX, control arm/study arm, and KRAS mutational status.
